# Supplementary material for: Construction of a multiplex mutation hot spot PCR panel: the first step towards colorectal cancer genotyping on the GS Junior platform
Source: PubMed Central journal article supplement — J Cancer. 2017 Jan 12;8(2):162–73. doi: 10.7150/jca.16037 (PMC5327365; doi:10.7150/jca.16037), 2017-01-12
Supplement: jcav08p0162s1.pdf [file jcav08p0162s1.pdf]

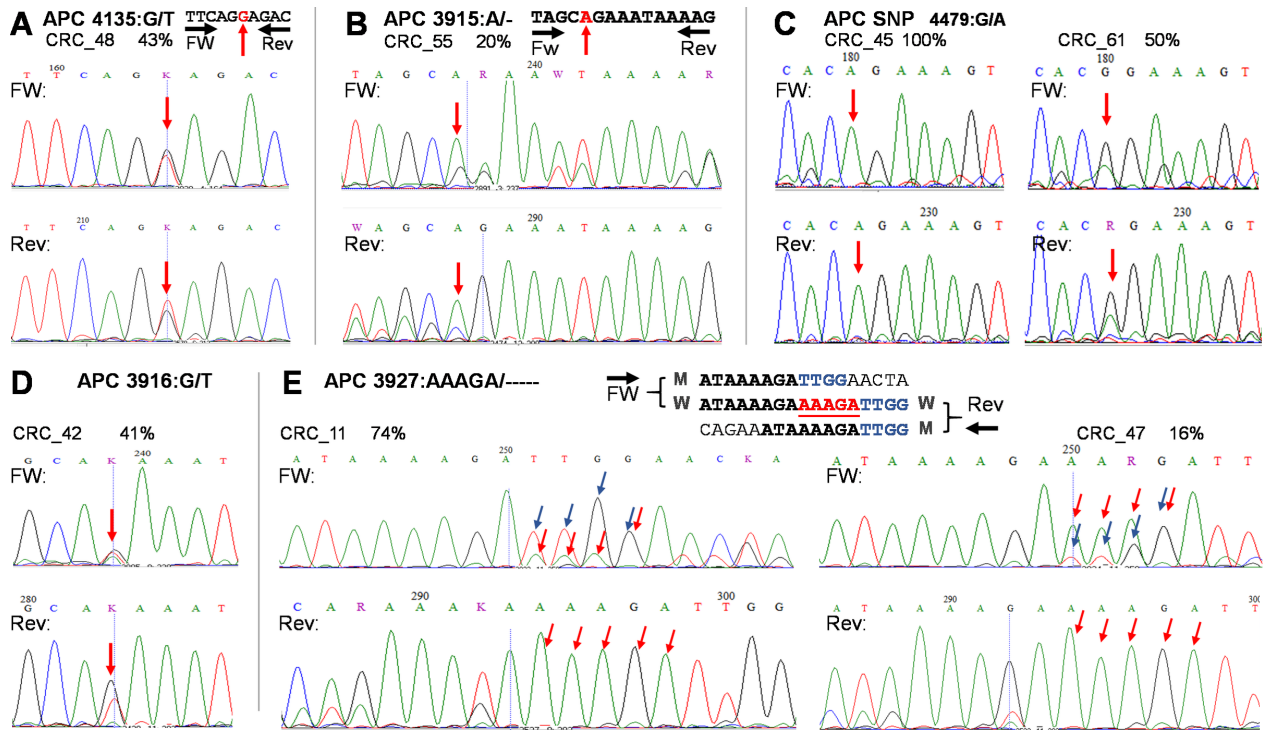

1

2 **Figure S1 - Re-sequencing of APC variants by Sanger protocol.**

3 APC point mutations (A, B, D), an SNP (C) and a 5 nucleotide deletion mutation (E), of CRC samples were re-

4 sequenced by Sanger sequencing protocol. The name of the variant and sample and the allele frequency obtained

5 by the GS Junior instrument, together with the short sequence around the variant analyzed is illustrated. Variable

6 positions are marked with red arrows. A guide material is given in case of the 5 nucleotide deletion (E) to help

7 the interpretation of the electropherograms. This guide shows the expected nucleotide peaks from the wild type

8 (W) and the mutant (M) alleles obtained by the forward (FW) or reverse (Rev) sequencing primers. Deleted

9 nucleotides are highlighted with underlined red letters in the W sequence, and red arrows on the

10 electropherogram.

11

12

13

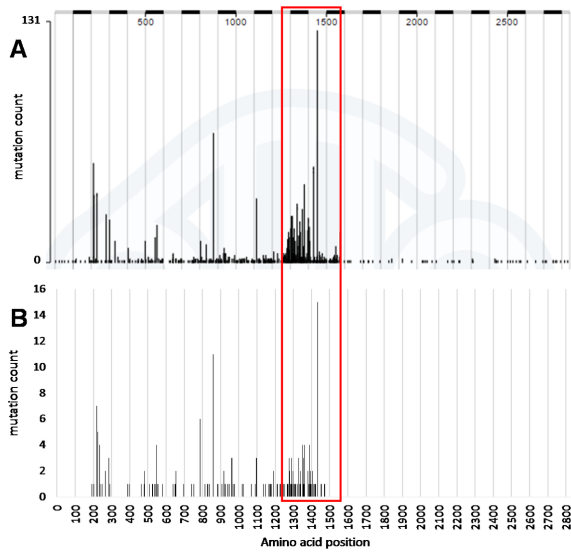

14

15 **Figure S2 - Distribution of APC mutations by TCGA and COSMIC data.**

16 Histograms show the number and position of mutations on APC cDNA by COSMIC (A), and TCGA (B) data.

17 The target area of the colon PCR panel on the APC gene is marked with a red frame.

18
